# Supplementary material
Source: Springer Nature journal article supplement (https://www.springermedizin.de/resource/supplementary/12889_2008_1437_MOESM3_ESM.pdf/9503866)

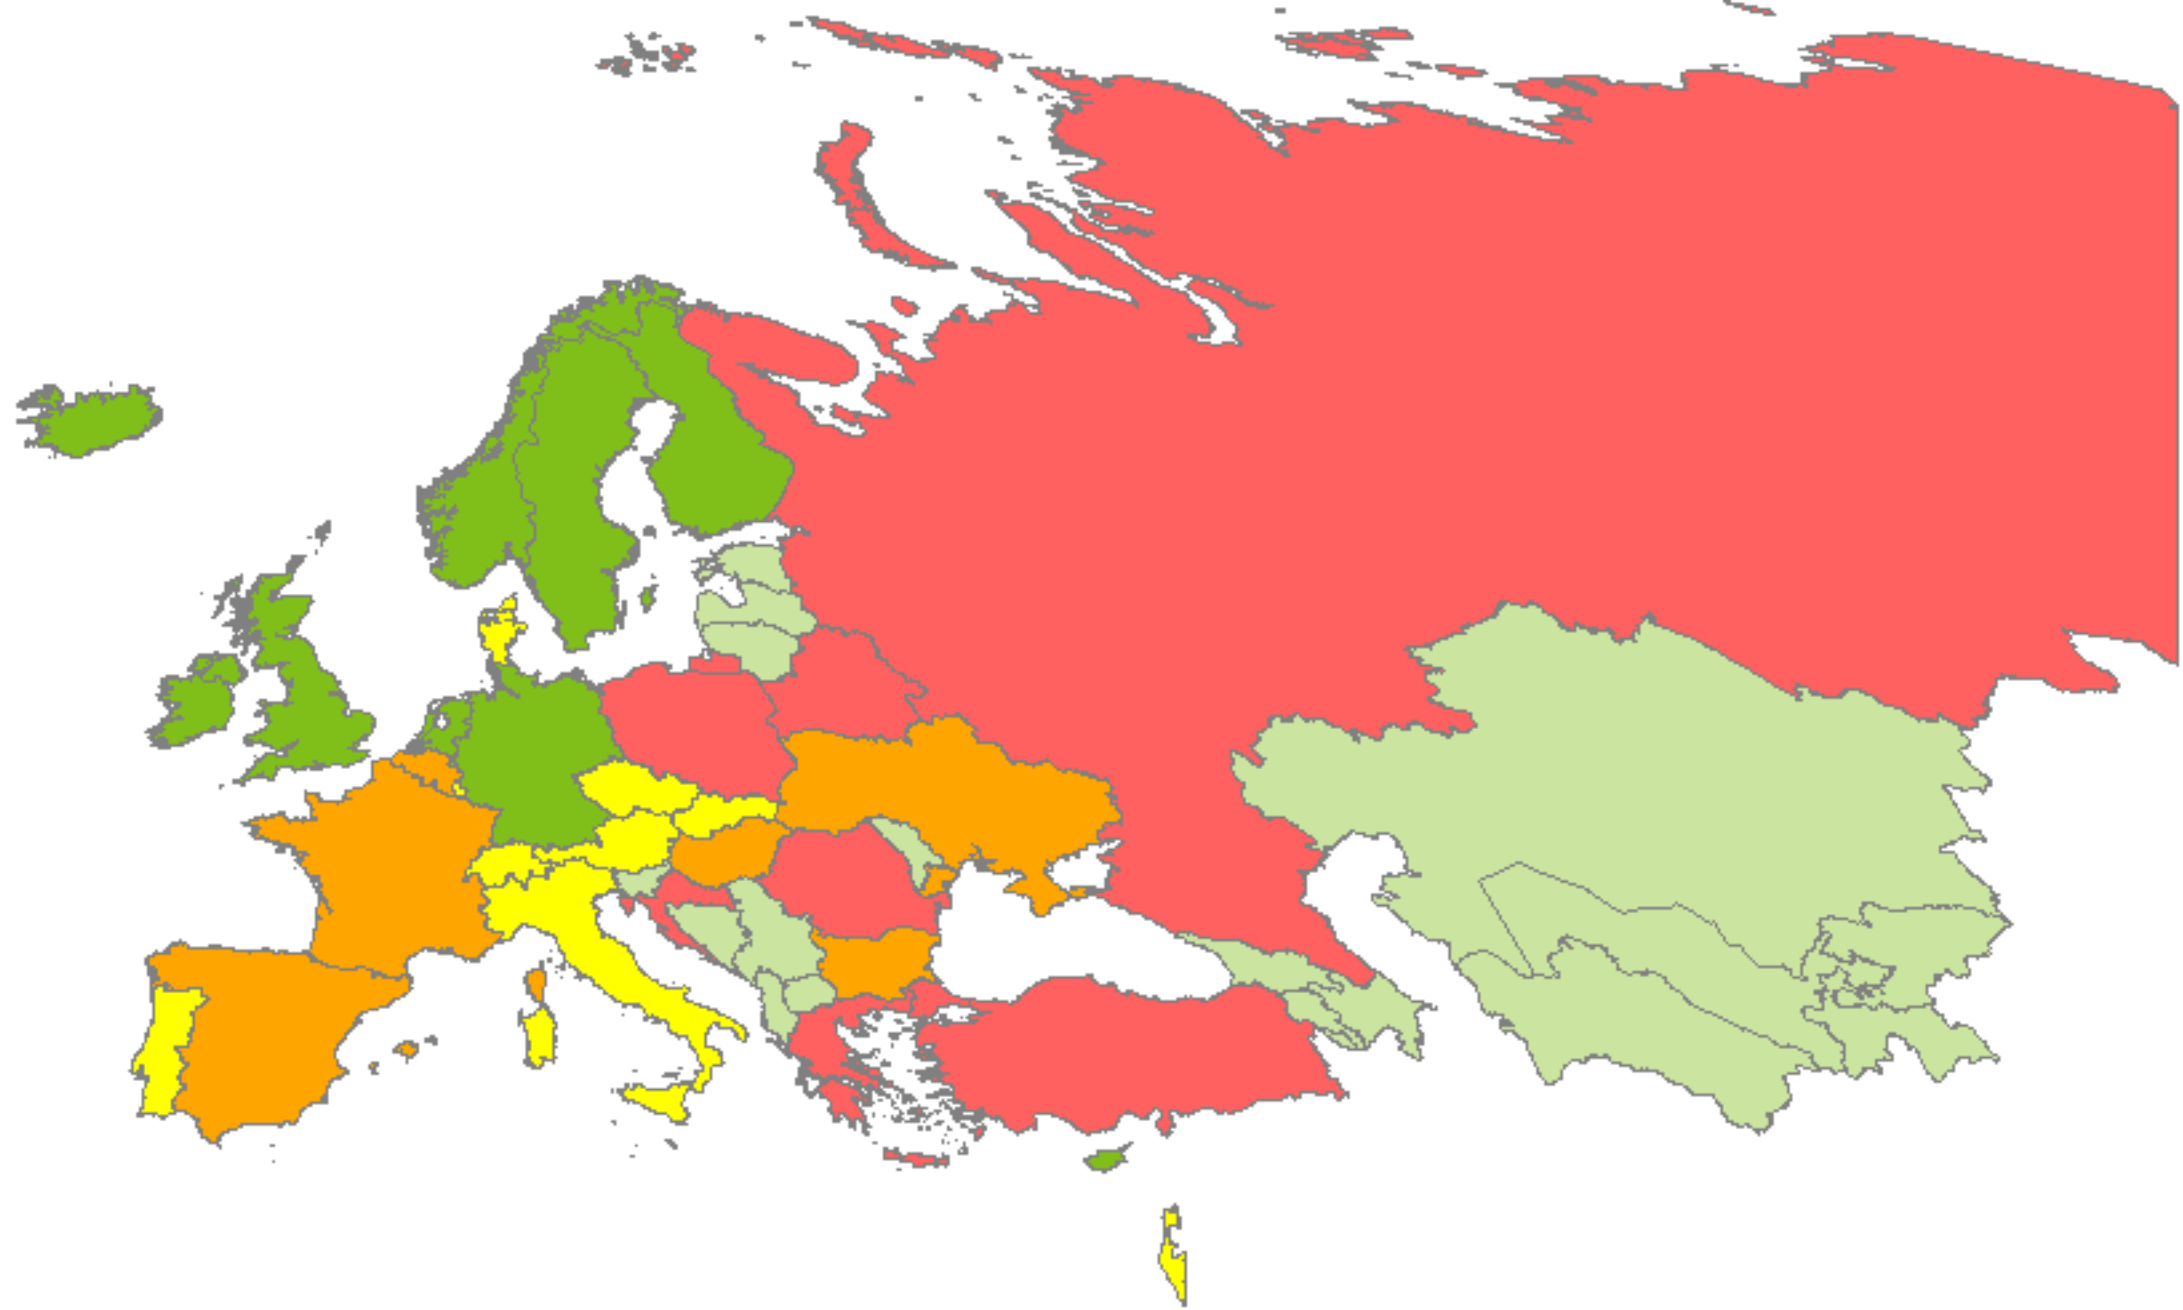

Prevalence (%)

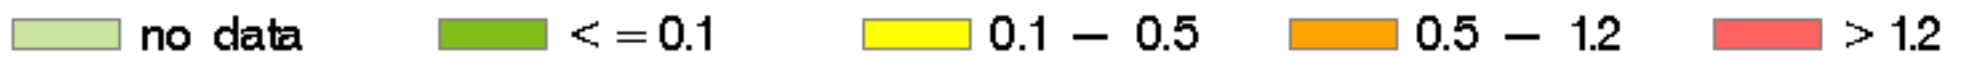

Supplement: MOESM3 [file 9503866]
